# Supplementary figures and images for: Classifying low flow hydrological regimes at a regional scale
Source: Copernicus journal article supplement (doi:10.5194/hess-15-3741-2011), 2011-12-19

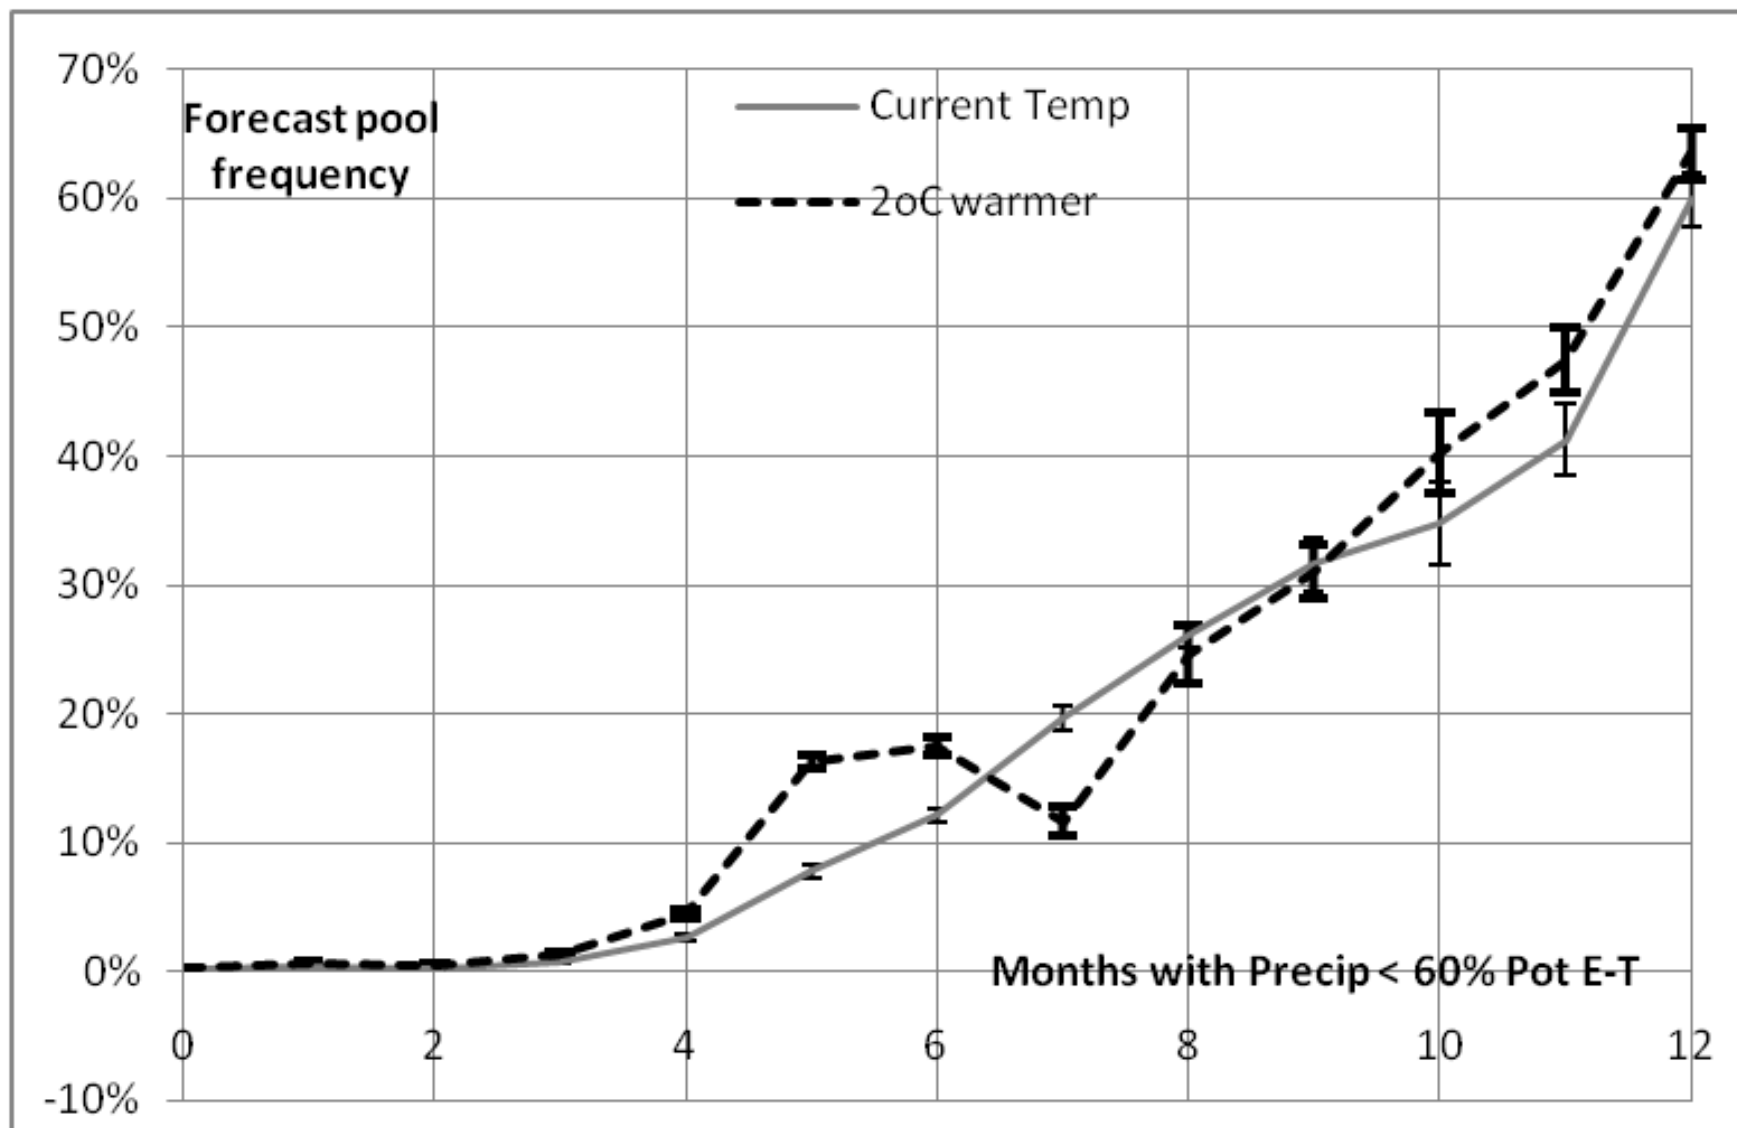

Supplement: Supplementary file 1 [file hess-15-3741-2011-supplement.pdf]
